# Supplementary material
Source: PubMed Central journal article supplement (PMC2397478)
Supplement: M800002200_1.pdf [file M800002200_1.pdf]

**Fig. S1.** Pairwise identities between the Src homologs presented in Figure 1. Identities were calculated by WU-BLAST (<http://www.proweb.org/proweb/Tools/WU-blast.html>).

**Fig. S2.** Immobilized MbSrc1 SH3 and SH2 domains bind to Cas in SYF cell lysates. The blot presented in Figure 2A was stripped and reprobed with anti-Cas antibody.

**Fig. S3.** Binding of the MbSrc1 SH3 domain to a Pro-rich peptide derived from the sequence of Sam68 (RGAAPPPPPVPRGRG). A representative titration is shown using 20  $\mu$ M SH3 domain and 5  $\mu$ l injections of 2 mM peptide. The dissociation constant derived from this titration was 2.1  $\mu$ M.

**Fig. S4.** Binding of MbSrc1 to the pYEEI-substrate peptide. The pYEEI-substrate peptide used in Figure 5 was coupled to Affi-Gel 15 resin as described previously (ref. 24). The immobilized peptide (or Affi-Gel resin as control) was incubated with lysate from SYF cells expressing FLAG-MbSrc1 (25  $\mu$ g total protein). After washing, the bound protein was detected by anti-FLAG Western blotting.

**Fig. S5.** pYEEI-substrates with shorter linker lengths are not phosphorylated efficiently by MbSrc1. The peptides tested were: the FEEI-substrate control shown in Figure 5; Y(7)pY, a shorter variant of the pYEEI-substrate with a 7-amino acid linker (ref. 42); and Y(3)pY, with a linker length of 3 amino acids. Phosphorylation of the peptides was measured using the phosphocellulose paper assay, as described in Materials and Methods.

**Fig. S6.** Identities between MbCsk and the Csk homologs presented in Figure 6. Identities were calculated by WU-BLAST (<http://www.proweb.org/proweb/Tools/WU-blast.html>).

**Fig. S7.** MALDI-TOF analysis of the MbCsk reaction on MbSrc1. The reactions are described in the legend to Figure 8A. This figure shows a larger range of m/z. The arrow in the bottom panel points to the peak arising from the phosphorylated C-terminal tail of MbSrc1. The large peak at ca. 2350 likely represents residual unmodified C-tail peptide.

**Fig. S8.** The indicated FLAG-tagged MbSrc1 constructs were expressed in SYF cells. Lysates were analyzed by SDS-PAGE and Western blotting with anti-phosphotyrosine and anti-FLAG antibodies.

| Database | Query              |                    |                    |                    |                     |                      |
|----------|--------------------|--------------------|--------------------|--------------------|---------------------|----------------------|
|          | Hsap               | Dmel               | Hvul               | Eflu               | Mbre                | Mova                 |
| Hsap     |                    | 54% Id,<br>73% Pos | 65% Id,<br>77% Pos | 57% Id,<br>72% Pos | 61 % Id,<br>77% Pos | 60% Id,<br>75 % Pos  |
| Dmel     | 50% Id,<br>67% Pos |                    | 50% Id,<br>68% Pos | 49% Id,<br>67%Pos  | 49% Id,<br>68% Pos  | 49% Id,<br>68% Pos   |
| Hvul     | 65% Id,<br>77% Pos | 51% Id,<br>69% Pos |                    | 61%Id,<br>75% Pos  | 63% Id,<br>78% Pos  | 60% Id,<br>78% Pos   |
| Eflu     | 56% Id,<br>71% Pos | 49% Id,<br>67% Pos | 57% Id,<br>72% Pos |                    | 58% Id,<br>75% Pos  | 58 % Id,<br>75 % Pos |
| Mbre     | 57% Id,<br>72% Pos | 49% Id,<br>68% Pos | 60% Id,<br>74% Pos | 58% Id,<br>75% Pos |                     | 73% Id,<br>84% Pos   |
| Mova     | 59% Id,<br>74% Pos | 50% Id,<br>68% Pos | 57% Id,<br>74% Pos | 57% Id,<br>75% Pos | 73%Id,<br>84%Pos    |                      |

Supplemental Figure S1

|        |      | GST |   | GST-SH2 |     | GST-SH3 |    | pulldown |                                   |
|--------|------|-----|---|---------|-----|---------|----|----------|-----------------------------------|
| lysate |      | -   | - | -       | -   | -       | 10 | 100      | polyPro peptide ( $\mu\text{M}$ ) |
| +Src   | -Src | -   | - | 10      | 100 | -       | -  | -        | pYEEI peptide ( $\mu\text{M}$ )   |

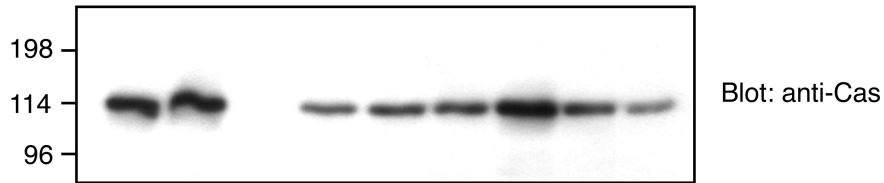

Supplemental Figure S2

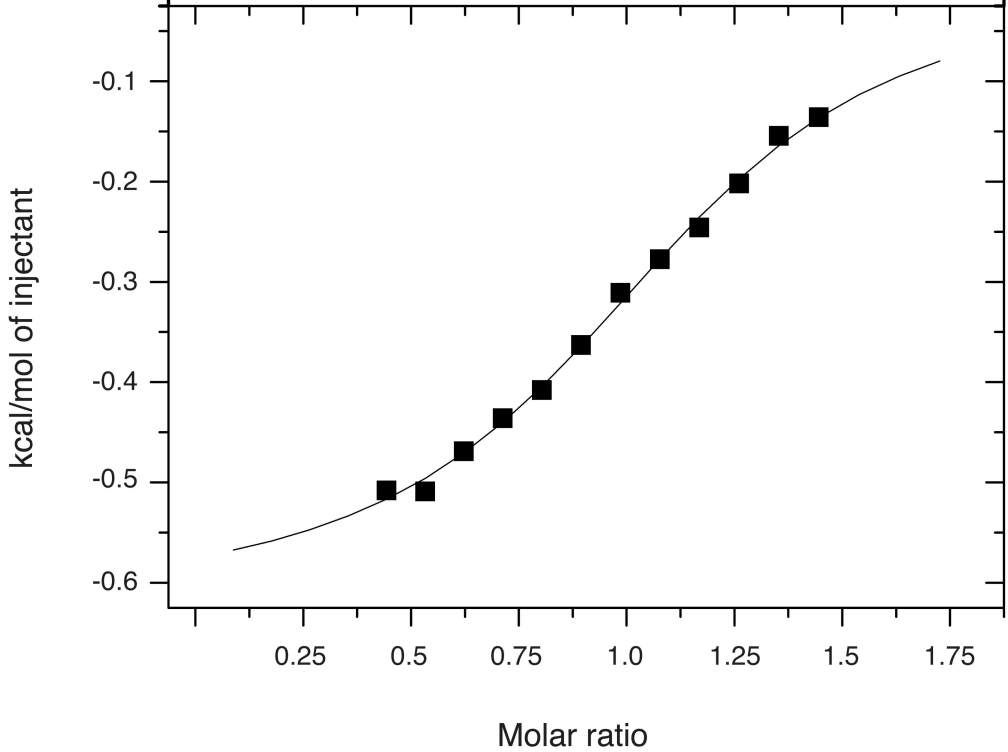

Supplemental Figure S3

control

substrate-pYEEI

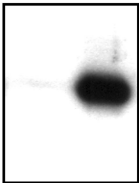

Supplemental Figure S4

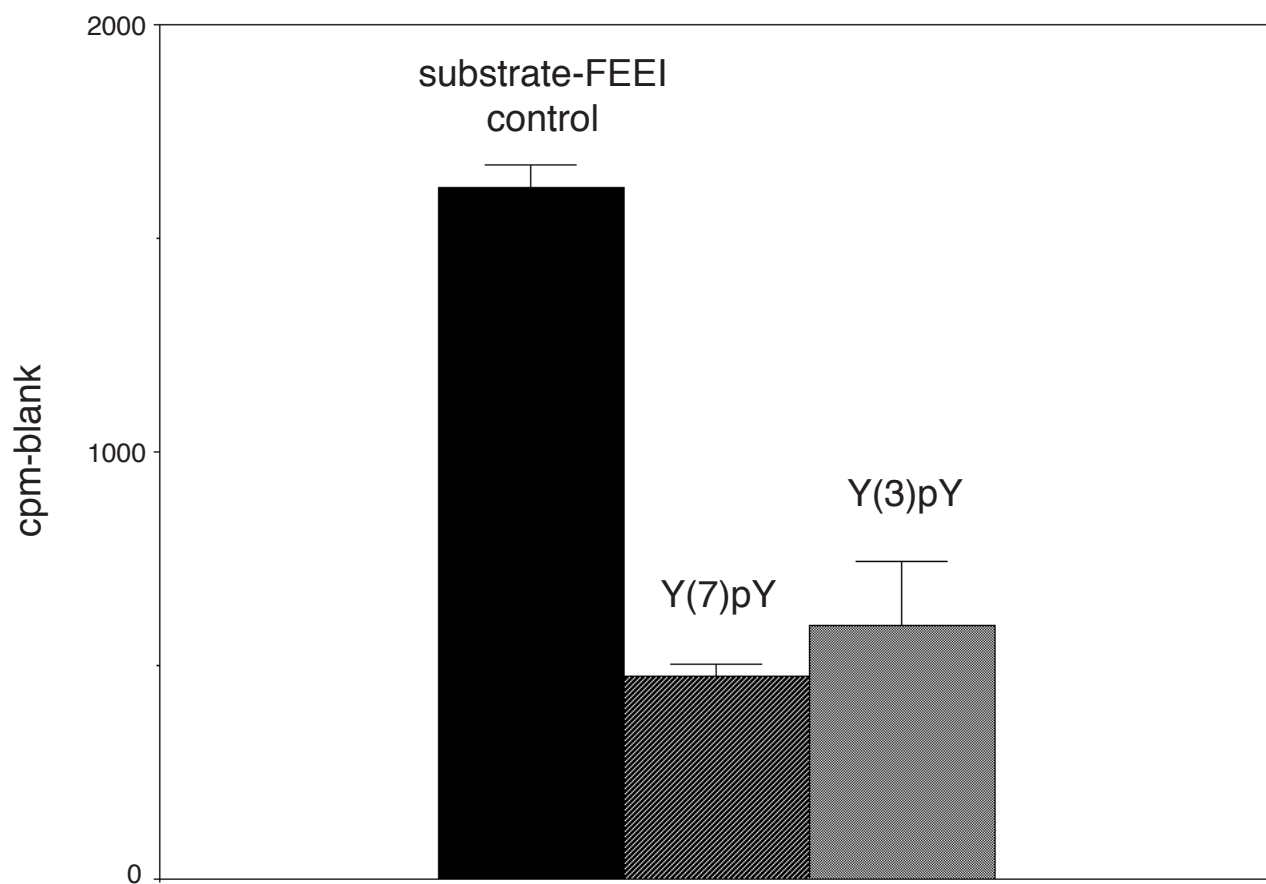

Supplemental Figure S5

| <b>Organism</b>        | <b>% Identities</b> | <b>% Positives</b> |
|------------------------|---------------------|--------------------|
| <i>H. sapiens</i>      | 51                  | 66                 |
| <i>D. melanogaster</i> | 52                  | 68                 |
| <i>H. vulgaris</i>     | 45                  | 66                 |
| <i>E. fluviatilis</i>  | 47                  | 68                 |
| <i>M. ovata</i>        | 56                  | 71                 |

**Supplemental Figure S6. Identities with MbCsk.**

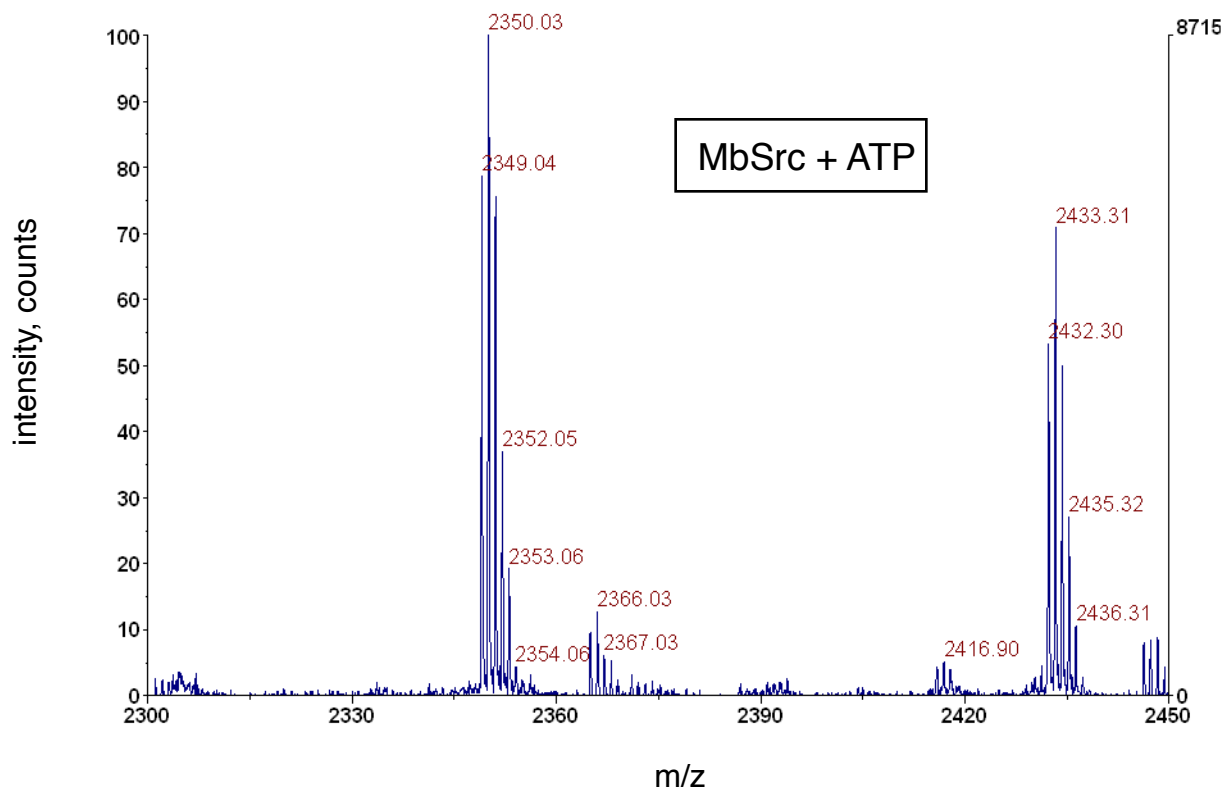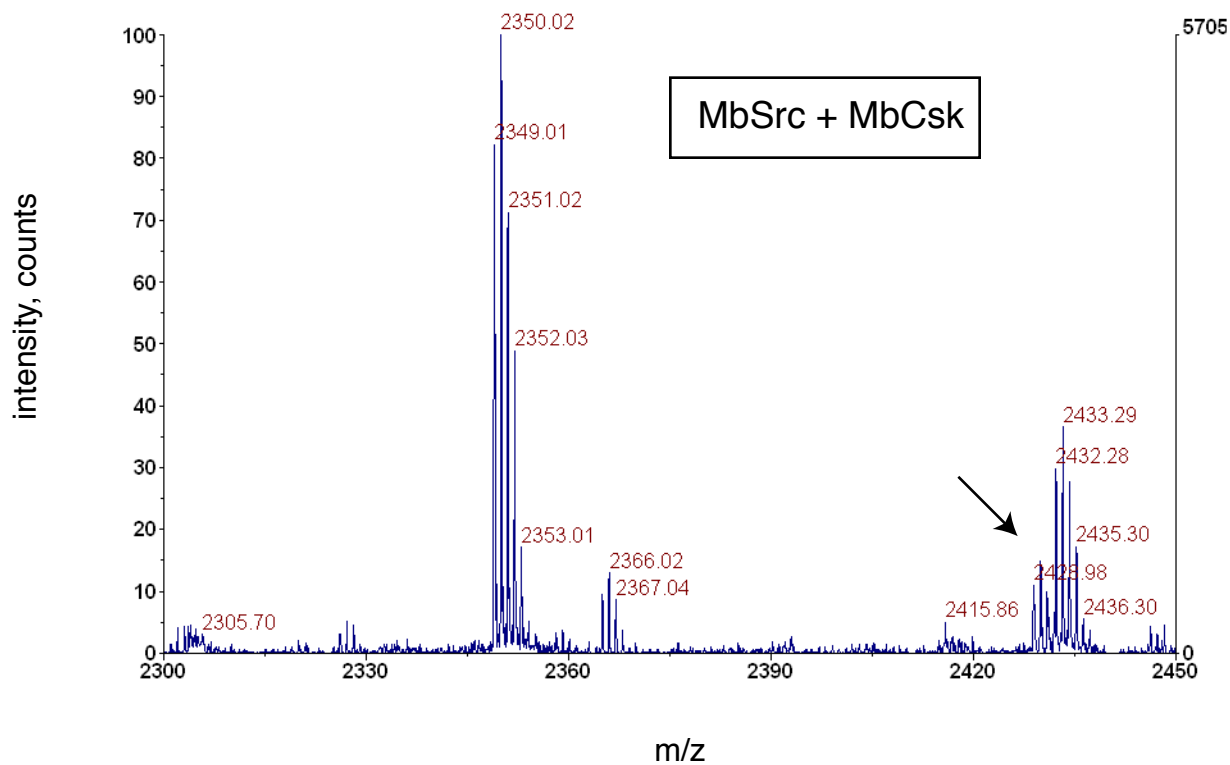

Supplemental Figure S7



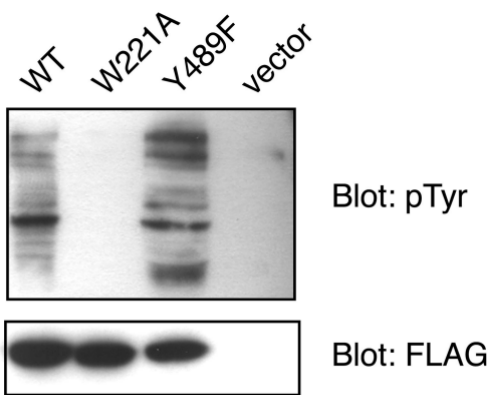

Supplemental Figure S8
